# Supplementary material for: Trends and source apportionment of aerosols in Europe during 1980–2018
Source: Copernicus journal article supplement (doi:10.5194/acp-20-2579-2020), 2020-03-02
Supplement: Supplementary file 1 [file acp-20-2579-2020-supplement.pdf]

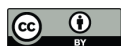

## *Supplement of*

# **Trends and source apportionment of aerosols in Europe during 1980–2018**

**Yang Yang et al.**

*Correspondence to:* Sijia Lou (lousijia@nju.edu.cn)

The copyright of individual parts of the supplement might differ from the CC BY 4.0 License.

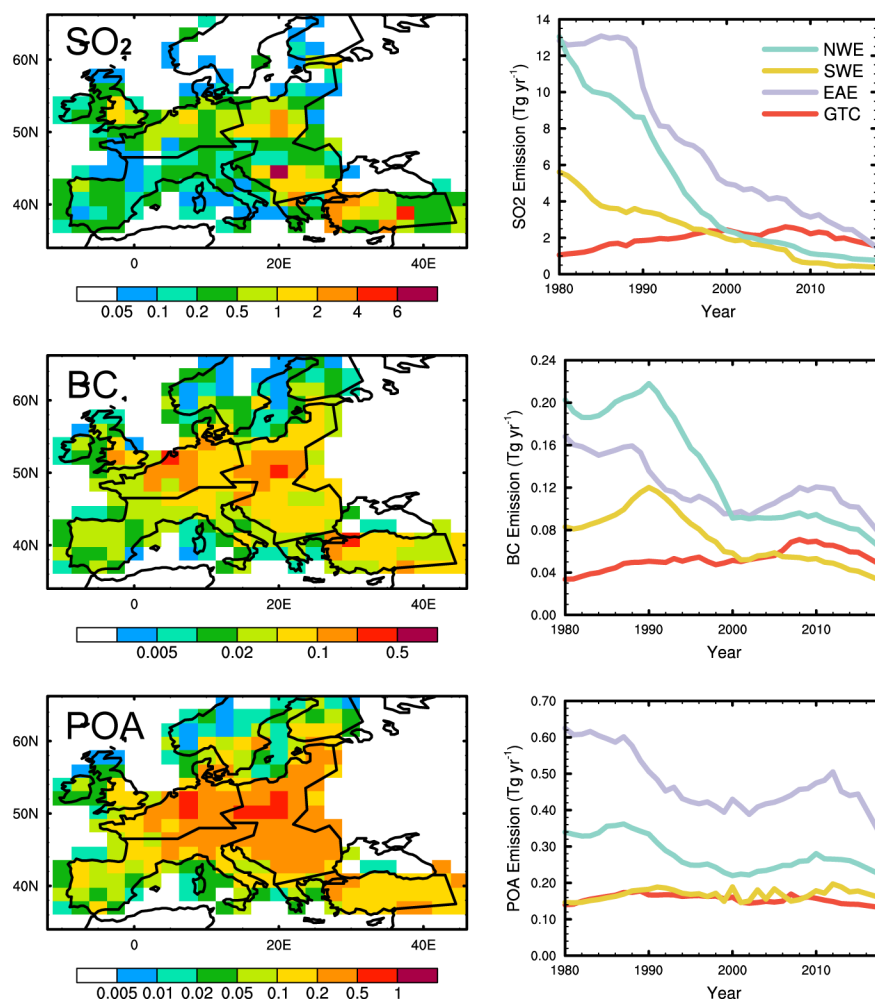

**Figure S1.** Spatial distribution (left) of annual mean (1980–2018) SO<sub>2</sub> (top), BC (middle) and POA (bottom) emissions (Tg m<sup>-2</sup> yr<sup>-1</sup>) over Europe. Time series (1980–2018) of annual total SO<sub>2</sub>, BC and POA emissions (Tg yr<sup>-1</sup>) from the four sub-regions of Europe.

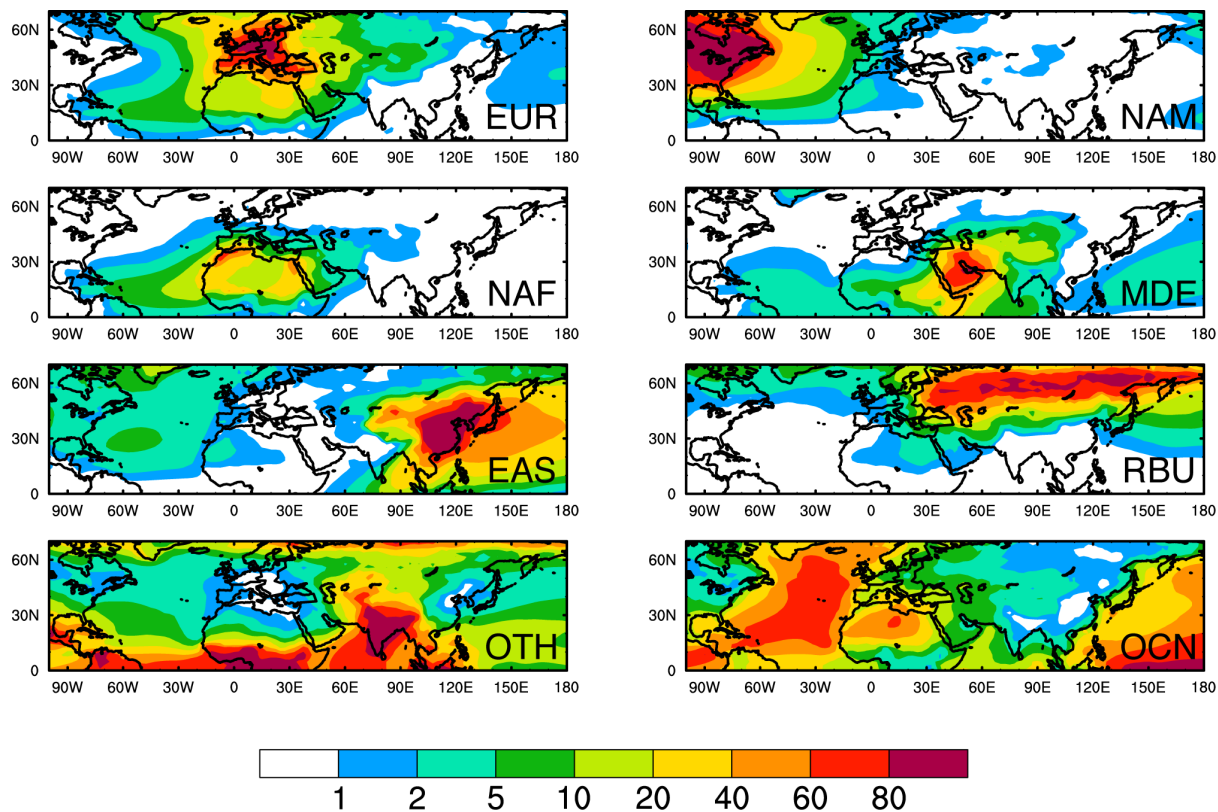

**Figure S2.** Relative contributions (%) to annual mean near-surface concentrations of sulfate-BC-POA from the major tagged source regions including Europe (EUR), North America (NAM), North Africa (NAF), the Middle East (MDE), East Asia (EAS), Russia-Belarus-Ukraine (RBU), Non-Arctic/Antarctic Ocean (OCN) and other (OTH) regions averaged over 2010–2018.

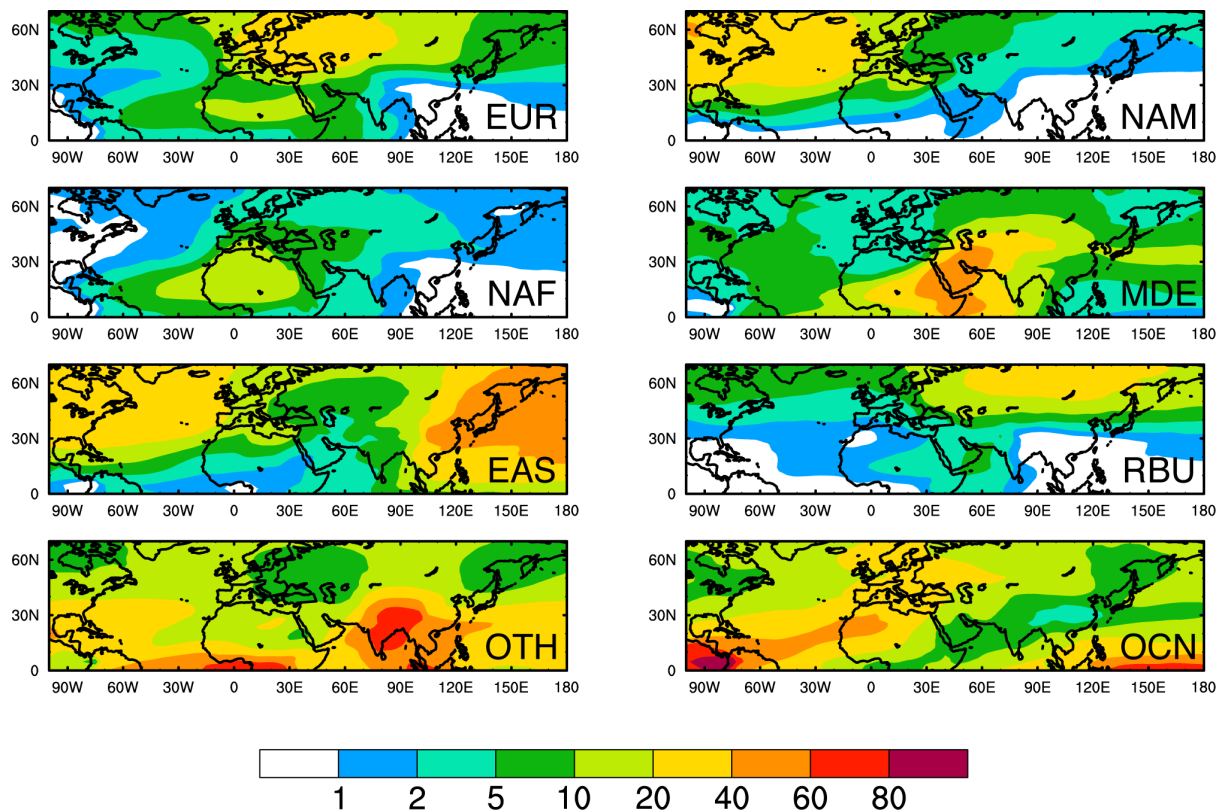

**Figure S3.** Relative contributions (%) to annual mean concentrations of sulfate-BC-POA at 500 hPa from the major tagged source regions including Europe (EUR), North America (NAM), North Africa (NAF), the Middle East (MDE), East Asia (EAS), Russia-Belarus-Ukraine (RBU), Non-Arctic/Antarctic Ocean (OCN) and other (OTH) regions averaged over 2010–2018.

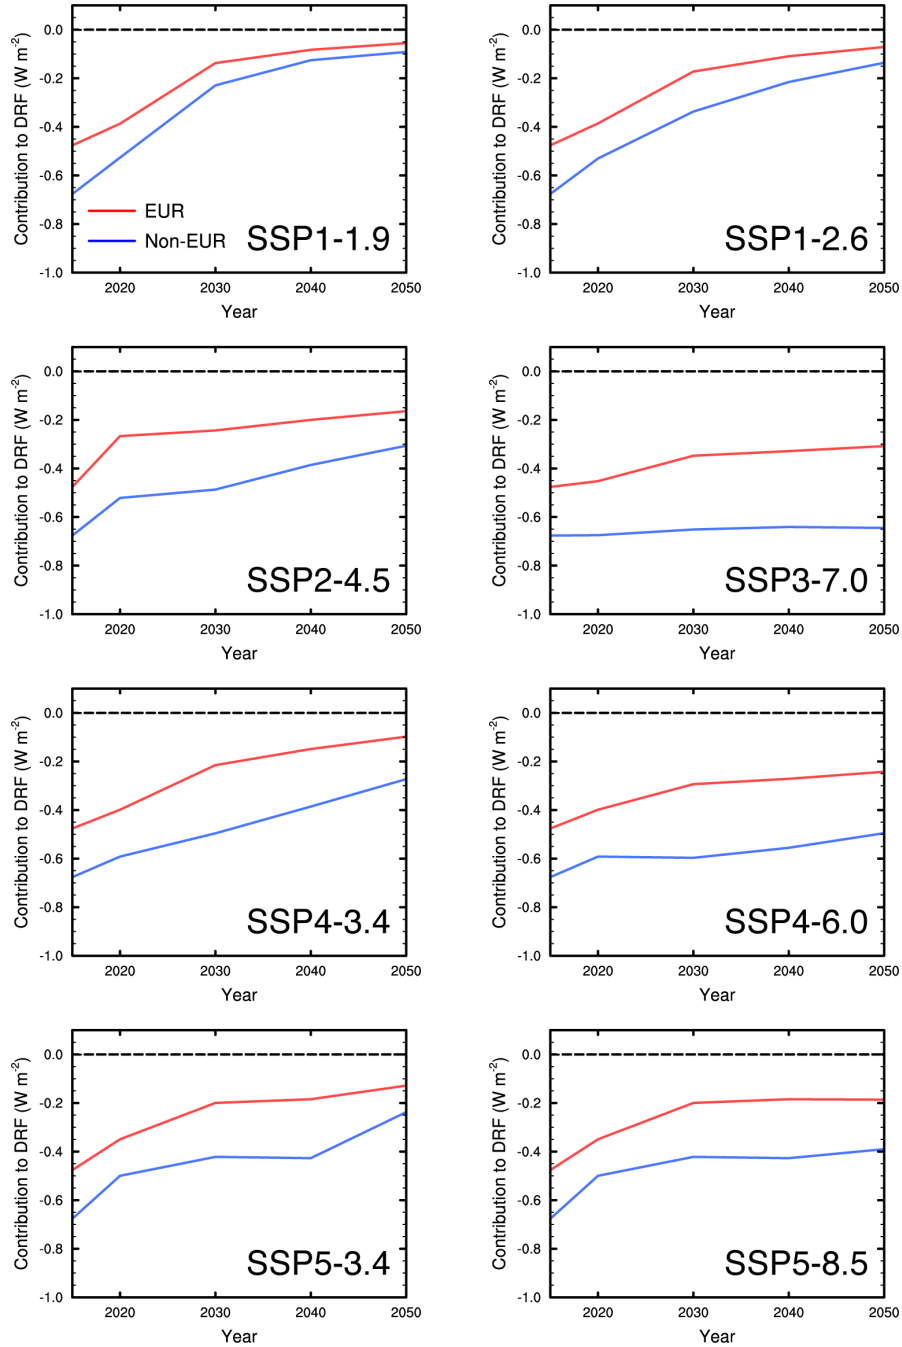

**Figure S4.** Time series (2015–2050) of estimated annual mean sulfate DRF over Europe contributed by European and non-European emissions from eight SSP scenarios, including SSP1-1.9, SSP1-2.6, SSP2-4.5, SSP3-7.0, SSP4-3.4, SSP4-6.0, SSP5-3.4, and SSP5-8.5. Future DRF of sulfate aerosol over Europe is estimated by scaling historical mean (1980–2018) sulfate DRF using the ratio of SSPs future SO<sub>2</sub> emissions to historical emissions assuming a linear response of DRF to regional emissions.
